# Supplementary material
Source: PubMed Central journal article supplement (PMC8864508)
Supplement: jama-e220799-s003.pdf [file jama-e220799-s003.pdf]

## Supplemental Online Content

Preskorn SH, Zeller S, Citrome L, et al. sublingual dexmedetomidine for treatment of agitation in patients with bipolar disorder: a randomized clinical trial. *JAMA*. doi:10.1001/jama.2022.0799

### **eMethods.**

**eResults.** Exploratory endpoints

**eTable 1.** Concomitant medication

**eTable 2.** Enrollment by study site

**eTable 3.** Electrocardiogram parameters notable abnormalities **criteria**

**eTable 4.** Exploratory efficacy endpoints: CGI-ACES

**eTable 5.** Post hoc analysis of PEC change from baseline 20 minutes to 120 minutes postdose with site as random effect

**eFigure 1.** Percentage of patients with a response on the PEC total score

**eFigure 2.** Mean (standard deviation) on the Clinical Global Impression-Improvement scale

**eFigure 3.** Percentage of patients with a response on the Clinical Global Impression-Improvement scale

**eFigure 4.** Percentage of patients with resolution of agitation on the Agitation-Calmness Evaluation scale

**eFigure 5.** Mean (standard deviation) change from baseline on the Agitation-Calmness Evaluation scale

This supplemental material has been provided by the authors to give readers additional information about their work.

## Methods

The study protocol and statistical analysis plan are available in Supplements 1 and 2.

## Results – Exploratory Endpoints

At 2 hours postdose, mean Positive and Negative Syndrome Scale-Excited Component (PEC) response ( $\geq 40\%$  reduction from baseline) rates were 90.5% and 77.0% with sublingual dexmedetomidine 180  $\mu\text{g}$  and 120  $\mu\text{g}$  compared with 46.0% with placebo (eFigure 1).

On the Clinical Global Impression-Improvement (CGI-I) scale, improvements in agitation (ie, lower CGI-I scores) relative to baseline were observed at 30 minutes postdose, with mean (standard deviation [SD]) scores of 3.0 (1.1) in both sublingual dexmedetomidine treatment groups and 3.4 (1.0) in the placebo group (eFigure 3). Agitation was much improved at 1 hour postdose, as shown by mean (SD) CGI-I scores of 2.0 (1.1) for sublingual dexmedetomidine 180  $\mu\text{g}$  and 2.2 (1.1) for sublingual dexmedetomidine 120  $\mu\text{g}$ , and it remained much improved at 2 hours postdose (mean [SD] scores of 1.6 [0.9] for 180  $\mu\text{g}$  and 1.9 [1.1] for 120  $\mu\text{g}$ ) and 4 hours postdose (mean [SD] scores of 1.5 [0.8] for 180  $\mu\text{g}$  and 1.8 [0.9] for 120  $\mu\text{g}$ ). The least squares mean (standard error [SE]) differences from placebo at 30 minutes, 1, 2, and 4 hours were  $-0.4$  (0.1),  $-1.0$  (0.1),  $-1.3$  (0.1), and  $-1.1$  (0.1) with sublingual dexmedetomidine 180  $\mu\text{g}$  and  $-0.3$  (0.1),  $-0.8$  (0.1),  $-0.9$  (0.1), and  $-0.8$  (0.1) with sublingual dexmedetomidine 120  $\mu\text{g}$ .

At 2 hours postdose, Agitation-Calmness Evaluation Scale (ACES) differences from placebo were observed in the sublingual dexmedetomidine 180  $\mu\text{g}$  and 120  $\mu\text{g}$  groups (least squares mean [SE] difference: 2.4 [0.2] and 1.8 [0.2], respectively). At 2, 4, and 8 hours postdose, the

percentage of patients who had their agitation resolved (ACES score  $\geq 4$ ) was greater in the sublingual dexmedetomidine 180  $\mu\text{g}$  and 120  $\mu\text{g}$  groups than in the placebo group (eFigure 4).

ACES change from baseline line through 8 hours postdose are presented in eTable 4 and eFigure 5. The respective percentages of patients experiencing calmness (improvement in ACES of  $\geq 1$  vs baseline) at 2, 4, and 8 hours postdose were 92.1% (116/126), 99.2% (125/126), and 94.4% (119/126) in the 180  $\mu\text{g}$  group, 83.3% (105/126) 92.1% (116/126) and 88.9% (112/126) in the 120  $\mu\text{g}$  group, and 56.3% (71/126), 79.4% (100/126), and 73.8% (93/126) with placebo.

Patient-reported medication acceptability was 80.2% with sublingual dexmedetomidine 180  $\mu\text{g}$  and 79.3% with sublingual dexmedetomidine 120  $\mu\text{g}$  and placebo. Overall, 65.1% (82/126) of patients treated with sublingual dexmedetomidine 180  $\mu\text{g}$ , 59.5% (75/126) of patients treated with sublingual dexmedetomidine 120  $\mu\text{g}$ , and 63.5% (80/126) of those treated with placebo liked the flavor of the medication. More than 99% of the patients in all treatment groups judged sublingual dexmedetomidine to have no unpleasant aroma, and the majority of participants judged the study medication to have no unpleasant aftertaste (84.9%, 92.1%, and 94.4% in the sublingual dexmedetomidine 180  $\mu\text{g}$ , 120  $\mu\text{g}$ , and placebo groups; Table 2).

**eTable 1. Concomitant medications**

|                                                   | Sublingual<br>Dexmedetomidine |                   | Placebo<br>(n=126) | Overall<br>(N=378) |
|---------------------------------------------------|-------------------------------|-------------------|--------------------|--------------------|
|                                                   | 180 µg<br>(n=126)             | 120 µg<br>(n=126) |                    |                    |
| Any concomitant medication, n (%)                 | 97 (77.0)                     | 104 (82.5)        | 95 (75.4)          | 296 (78.3)         |
| Other antidepressants                             | 37 (29.4)                     | 36 (28.6)         | 26 (20.6)          | 99 (26.2)          |
| Trazodone                                         | 18 (14.3)                     | 15 (11.9)         | 10 (7.9)           | 43 (11.4)          |
| Bupropion                                         | 10 (7.9)                      | 8 (6.3)           | 9 (7.1)            | 27 (7.1)           |
| Lamotrigine                                       | 7 (5.6)                       | 7 (5.6)           | 3 (2.4)            | 17 (4.5)           |
| Mirtazepine                                       | 5 (4.0)                       | 4 (3.2)           | 3 (2.4)            | 12 (3.2)           |
| Duloxetine                                        | 4 (3.2)                       | 3 (2.4)           | 1 (.8)             | 8 (2.1)            |
| Venlafaxine                                       | 2 (1.6)                       | 2 (1.6)           | 4 (3.2)            | 8 (2.1)            |
| Wellbutrin                                        | 1 (.8)                        | 4 (3.2)           | 1 (.8)             | 6 (1.6)            |
| Other antipsychotics                              | 23 (18.3)                     | 33 (26.2)         | 32 (25.4)          | 88 (23.3)          |
| Divalproex sodium                                 | 10 (7.9)                      | 9 (7.1)           | 9 (7.1)            | 28 (7.4)           |
| Risperidone                                       | 3 (2.4)                       | 6 (4.8)           | 10 (7.9)           | 19 (5.0)           |
| Abilify                                           | 3 (2.4)                       | 6 (4.8)           | 7 (5.6)            | 16 (4.2)           |
| Aripiprazole                                      | 4 (3.2)                       | 7 (5.6)           | 3 (2.4)            | 14 (3.7)           |
| Diazepines, oxazepines, thiazepines, and oxepines | 26 (20.6)                     | 39 (31.0)         | 22 (17.5)          | 87 (23.0)          |
| Quetiapine                                        | 21 (16.7)                     | 28 (22.2)         | 19 (15.1)          | 68 (18.0)          |
| Zyprexa                                           | 3 (2.4)                       | 6 (4.8)           | 3 (2.4)            | 12 (3.2)           |
| Olanzapine                                        | 2 (1.6)                       | 5 (4.0)           | 0                  | 7 (1.9)            |
| Selective serotonin reuptake inhibitors           | 24 (19.0)                     | 21 (16.7)         | 20 (15.9)          | 65 (17.2)          |
| Sertraline                                        | 5 (4.0)                       | 7 (5.6)           | 8 (6.3)            | 20 (5.3)           |
| Escitalopram                                      | 8 (6.3)                       | 4 (3.2)           | 2 (1.6)            | 14 (3.7)           |
| Citalopram                                        | 4 (3.2)                       | 2 (1.6)           | 5 (4.0)            | 11 (2.9)           |
| Benzodiazepine derivatives                        | 14 (11.1)                     | 17 (13.5)         | 16 (12.7)          | 47 (12.4)          |
| Lorazepam                                         | 9 (7.1)                       | 6 (4.8)           | 6 (4.8)            | 21 (5.6)           |
| Clonazepam                                        | 3 (2.4)                       | 5 (4.0)           | 4 (3.2)            | 12 (3.2)           |
| Temazepam                                         | 2 (1.6)                       | 5 (4.0)           | 4 (3.2)            | 11 (2.9)           |
| Other analgesics and antipyretics                 | 14 (11.1)                     | 19 (15.1)         | 9 (7.1)            | 42 (11.1)          |
| Gabapentin                                        | 14 (11.1)                     | 19 (15.1)         | 9 (7.1)            | 42 (11.1)          |
| Propionic acid derivatives                        | 16 (12.7)                     | 11 (8.7)          | 8 (6.3)            | 35 (9.3)           |
| Ibuprofen                                         | 15 (11.9)                     | 5 (4.0)           | 6 (4.8)            | 26 (6.9)           |
| Naproxen                                          | 1 (.8)                        | 5 (4.0)           | 2 (1.6)            | 8 (2.1)            |
| Proton pump inhibitors                            | 8 (6.3)                       | 14 (11.1)         | 9 (7.1)            | 31 (8.2)           |
| Omeprazole                                        | 4 (3.2)                       | 7 (5.6)           | 4 (3.2)            | 15 (4.0)           |
| Pantoprazole                                      | 2 (1.6)                       | 2 (1.6)           | 4 (3.2)            | 8 (2.1)            |
| Lithium                                           | 13 (10.3)                     | 7 (5.6)           | 9 (7.1)            | 29 (7.7)           |
| Lithium                                           | 9 (7.1)                       | 3 (2.4)           | 8 (6.3)            | 20 (5.3)           |

|                                                    | Sublingual<br>Dexmedetomidine |                   | Placebo<br>(n=126) | Overall<br>(N=378) |
|----------------------------------------------------|-------------------------------|-------------------|--------------------|--------------------|
|                                                    | 180 µg<br>(n=126)             | 120 µg<br>(n=126) |                    |                    |
| Lithium carbonate                                  | 4 (3.2)                       | 4 (3.2)           | 1 (.8)             | 4 (1.1)            |
| Selective beta-2-adrenoreceptor agonists           | 11 (8.7)                      | 8 (6.3)           | 10 (7.9)           | 29 (7.7)           |
| Albuterol                                          | 6 (4.8)                       | 5 (4.0)           | 6 (4.8)            | 17 (4.5)           |
| Indole derivatives                                 | 12 (9.5)                      | 9 (7.1)           | 7 (5.6)            | 28 (7.4)           |
| Lurasidone                                         | 7 (5.6)                       | 5 (4.0)           | 7 (5.6)            | 19 (5.0)           |
| Ziprasidone                                        | 4 (3.2)                       | 3 (2.4)           | 1 (.8)             | 8 (2.1)            |
| Angiotensin-converting enzyme inhibitors,<br>plain | 10 (7.9)                      | 14 (11.1)         | 3 (2.4)            | 27 (7.1)           |
| Lisinopril                                         | 8 (6.3)                       | 11 (8.7)          | 3 (2.4)            | 22 (5.8)           |
| Diphenylmethane derivatives                        | 8 (6.3)                       | 12 (9.5)          | 6 (4.8)            | 26 (6.9)           |
| Hydroxyzine                                        | 8 (6.3)                       | 12 (9.5)          | 6 (4.8)            | 26 (6.9)           |
| Dihydropyridine derivatives                        | 8 (6.3)                       | 10 (7.9)          | 8 (6.3)            | 26 (6.9)           |
| Amlodipine                                         | 8 (6.3)                       | 8 (6.3)           | 7 (5.6)            | 23 (6.1)           |
| HMG CoA reductase inhibitors                       | 7 (5.6)                       | 10 (7.9)          | 8 (6.3)            | 25 (6.6)           |
| Atorvastatin                                       | 5 (4.0)                       | 8 (6.3)           | 3 (2.4)            | 16 (4.2)           |
| Simvastatin                                        | 0                             | 0                 | 4 (3.2)            | 4 (1.1)            |
| Anilides                                           | 8 (6.3)                       | 9 (7.1)           | 4 (3.2)            | 21 (5.6)           |
| Paracetamol                                        | 8 (6.3)                       | 8 (6.3)           | 4 (3.2)            | 20 (5.3)           |
| Azaspirodecanedione derivatives                    | 7 (5.6)                       | 8 (6.3)           | 3 (2.4)            | 18 (4.8)           |
| Buspirone                                          | 7 (5.6)                       | 7 (5.6)           | 3 (2.4)            | 17 (4.5)           |
| Thiazides, plain                                   | 7 (5.6)                       | 7 (5.6)           | 3 (2.4)            | 17 (4.5)           |
| Hydrochlorothiazide                                | 7 (5.6)                       | 7 (5.6)           | 3 (2.4)            | 17 (4.5)           |
| Biguanides                                         | 5 (4.0)                       | 8 (6.3)           | 4 (3.2)            | 17 (4.5)           |
| Metformin                                          | 5 (4.0)                       | 8 (6.3)           | 4 (3.2)            | 17 (4.5)           |
| Ethers of tropine or tropine derivatives           | 2 (1.6)                       | 5 (4.0)           | 7 (5.6)            | 14 (3.7)           |
| Benztropine                                        | 2 (1.6)                       | 5 (4.0)           | 7 (5.6)            | 14 (3.7)           |
| Other hypnotics and sedatives                      | 3 (2.4)                       | 5 (4.0)           | 2 (1.6)            | 10 (2.6)           |
| Diphenhydramine                                    | 2 (1.6)                       | 4 (3.2)           | 2 (1.6)            | 8 (2.1)            |
| Other centrally acting agents                      | 2 (1.6)                       | 3 (2.4)           | 5 (4.0)            | 10 (2.6)           |
| Tizanidine                                         | 1 (.8)                        | 0                 | 4 (3.2)            | 5 (1.3)            |
| Thyroid hormones                                   | 1 (.8)                        | 6 (4.8)           | 3 (2.4)            | 10 (2.6)           |
| Levothyroxine                                      | 1 (.8)                        | 6 (4.8)           | 3 (2.4)            | 10 (2.6)           |
| Beta-blocking agents, nonselective                 | 4 (3.2)                       | 2 (1.6)           | 0                  | 6 (1.6)            |
| Propranolol                                        | 4 (3.2)                       | 2 (1.6)           | 0                  | 6 (1.6)            |

**eTable 2. Enrollment by study site**

| <b>Site</b>                           | <b>Location</b>     | <b>Patients Randomized</b> |
|---------------------------------------|---------------------|----------------------------|
| Altea Research Institute              | Las Vegas, NV       | 29                         |
| Carolina Clinical Trials              | Charleston, SC      | 12                         |
| Center for Behavioral Health          | Gaithersburg, MD    | 36                         |
| Collaborative Neuroscience Network    | Long Beach, CA      | 35                         |
| Community Clinical Research           | Austin, TX          | 3                          |
| Comprehensive Clinical Development    | Cerritos, CA        | 15                         |
| Hassman Research Institute            | Berlin, NJ          | 32                         |
| Hassman Research Institute            | Marlton, NJ         | 40                         |
| InSite Clinical Research              | DeSoto, TX          | 28                         |
| NRC Research Institute                | Orange, CA          | 23                         |
| Pillar Clinical Research              | Richardson, TX      | 43                         |
| ProScience Research Group             | Culver City, CA     | 5                          |
| Segal Trials                          | Fort Lauderdale, FL | 51                         |
| Uptown Research Institute             | Chicago, IL         | 9                          |
| Woodland International Research Group | Little Rock, AK     | 19                         |

**eTable 3. Electrocardiogram Parameters Notable Abnormalities Criteria**

| ECG Parameter                   | Notable Abnormality Criteria                                                                                |
|---------------------------------|-------------------------------------------------------------------------------------------------------------|
| ECG Mean Heart Rate (BPM)       | Decrease in HR from baseline > 25% to a HR < 50 bpm or increase in HR from baseline > 25% to a HR > 100 bpm |
| PR Interval, Aggregate (msec)   | Increase in PR from baseline >25 % to a PR > 200 msec                                                       |
| QRS Duration, Aggregate (msec)  | Increase in QRS from baseline > 25% to a QRS >120 msec                                                      |
| QTcF Interval, Aggregate (msec) | QTcF ≤ 450 msec                                                                                             |
|                                 | QTcF ≤ 450 msec                                                                                             |
|                                 | QTcF ≤ 450 msec                                                                                             |
|                                 | QTcF > 450 msec                                                                                             |
|                                 | QTcF > 480 msec                                                                                             |
|                                 | QTcF > 500 msec                                                                                             |
|                                 | QTcF increase ≤ 30 msec                                                                                     |
|                                 | QTcF increase > 30 msec to ≤ 60 msec                                                                        |
|                                 | QTcF increase > 60 msec                                                                                     |

**eTable 4. Exploratory efficacy endpoints: CGI-I and ACES**

|              | Sublingual Dexmedetomidine |                                |             |                                | Placebo     |                                |
|--------------|----------------------------|--------------------------------|-------------|--------------------------------|-------------|--------------------------------|
|              | 180 µg                     |                                | 120 µg      |                                |             |                                |
| <b>CGI-I</b> | <b>Mean</b>                | <b>95% Confidence Interval</b> | <b>Mean</b> | <b>95% Confidence Interval</b> | <b>Mean</b> | <b>95% Confidence Interval</b> |
| 30 minutes   | 3.0                        | 2.77, 3.15                     | 3.0         | 2.85, 3.23                     | 3.4         | 3.19, 3.53                     |
| 1 hour       | 2.0                        | 1.80, 2.20                     | 2.2         | 2.03, 2.43                     | 3.0         | 2.79, 3.18                     |
| 2 hours      | 1.6                        | 1.40, 1.71                     | 1.9         | 1.73, 2.13                     | 2.8         | 2.62, 3.04                     |
| 4 hours      | 1.5                        | 1.36, 1.65                     | 1.8         | 1.60, 1.96                     | 2.3         | 2.04, 2.57                     |
| <b>ACES</b>  |                            |                                |             |                                |             |                                |
| 2 hours      | 5.6                        | 5.34, 5.95                     | 5.0         | 4.71, 5.39                     | 3.3         | 3.05, 3.57                     |
| 4 hours      | 5.5                        | 5.18, 5.76                     | 5.1         | 4.74, 5.37                     | 3.9         | 3.52, 4.22                     |
| 8 hours      | 4.6                        | 4.37, 4.89                     | 4.2         | 3.95, 4.50                     | 3.6         | 3.30, 3.84                     |

Abbreviations: CGI-I, Clinical Global Impressions – Improvement with possible scores ranging from 1 (very much improved) to 7 (very much worse); ACES, Agitation-Calmness Evaluation Scale, a single-item measure used to rate overall agitation and calmness where 1=marked agitation, 2=moderate agitation, 3=mild agitation 4=normal behavior, 5=mild calmness, 6=moderate calmness, 7=marked calmness, 8=deep sleep, and 9=unarousable.



**eTable 5. Post hoc analysis of PEC change from baseline 20 minutes to 120 minutes**

**postdose with site as random effect**

| Time Postdose                                              | Sublingual Dexmedetomidine  |                             | Placebo             |
|------------------------------------------------------------|-----------------------------|-----------------------------|---------------------|
|                                                            | 180 µg                      | 120 µg                      |                     |
| 20 min, mean (95% CI) <sup>a</sup>                         | -3.1 (-3.85, -2.28)         | -2.9 (-3.62, -2.27)         | -1.9 (-2.40, -1.34) |
| LS Mean (SE) <sup>b</sup>                                  | -3.0 (0.4)                  | -2.9 (0.4)                  | -1.9 (0.4)          |
| Difference (97.5% CI) <sup>c</sup><br>P value <sup>d</sup> | -1.1 (-2.0, -0.2)<br>.007   | -1.0 (-1.9, -0.1)<br>.01    |                     |
| 30 min mean (95% CI) <sup>a</sup>                          | -4.6 (-5.53, -3.74)         | -4.3 (-5.18, -3.47)         | -2.8 (-3.46, -2.11) |
| LS Mean (SE) <sup>b</sup>                                  | -4.6 (0.5)                  | -4.3 (0.5)                  | -2.8 (0.5)          |
| Difference (97.5% CI) <sup>c</sup><br>P value <sup>d</sup> | -1.7 (-2.9, -0.6)<br>< .001 | -1.5 (-2.6, -0.4)<br>.003   |                     |
| 45 min, mean (95% CI) <sup>a</sup>                         | -6.7 (-7.59, -5.79)         | -6.3 (-7.25, -5.38)         | -3.6 (-4.36, -2.91) |
| LS Mean (SE) <sup>b</sup>                                  | -6.6 (0.5)                  | -6.3 (0.5)                  | -3.7 (0.5)          |
| Difference (97.5% CI) <sup>c</sup><br>P value <sup>d</sup> | -3.0 (-4.2, -1.7)<br>< .001 | -2.6 (-3.9, -1.4)<br>< .001 |                     |
| 60 min, mean (95% CI) <sup>a</sup>                         | -8.4 (-9.27, -7.45)         | -7.5 (-8.46, -6.62)         | -4.4 (-5.17, -3.57) |
| LS Mean (SE) <sup>b</sup>                                  | -8.3 (0.5)                  | -7.5 (0.5)                  | -4.4 (0.5)          |
| Difference (97.5% CI) <sup>c</sup><br>P value <sup>d</sup> | -3.9 (-5.1, -2.6)<br>< .001 | -3.1 (-4.4, -1.9)<br>< .001 |                     |
| 90 min, mean (95% CI) <sup>a</sup>                         | -9.7 (-10.60, -8.87)        | -8.6 (-9.50, -7.64)         | -4.7 (-5.46, -3.87) |
| LS Mean (SE) <sup>b</sup>                                  | -9.7 (0.5)                  | -8.6 (0.5)                  | -4.7 (0.5)          |
| Difference (97.5% CI) <sup>c</sup><br>P value <sup>d</sup> | -5.0 (-6.2, -3.7)<br>< .001 | -3.9 (-5.1, -2.6)<br>< .001 |                     |
| 120 min, mean (95% CI) <sup>a</sup>                        | -10.4 (-11.21, -9.64)       | -9.0 (-9.96, -8.10)         | -4.9 (-5.73, -4.08) |
| LS Mean (SE) <sup>b</sup>                                  | -10.4 (0.5)                 | -9.0 (0.5)                  | -4.9 (0.5)          |
| Difference (97.5% CI) <sup>c</sup><br>P value <sup>d</sup> | -5.4 (-6.6, -4.2)<br>< .001 | -4.1 (-5.3, -2.9)<br>< .001 |                     |

Abbreviations: PEC (The Positive and Negative Syndrome Scale - Excited Component) is the sum of 5 subscales (poor impulse control, tension, hostility, uncooperativeness, and excitement) with each subscale ranging from 1 to 7 and total score ranging from 5 to 35. Observations after use of rescue medication are censored (set to missing).

Test statistics and estimates are from a restricted maximum likelihood repeated measures mixed model on change from baseline values. The covariates included in the models are: baseline PEC score, age stratum, timepoint (including all 7 timepoints from 10 minutes to 2 hours post-dose), treatment group, baseline PEC score by timepoint interaction term, and treatment group by timepoint interaction term. Study site is also included as a random effect with TYPE=VC (variance components) option (which models a different variance component for each random effect).

<sup>a</sup> Mean change from predose PEC total score

<sup>b</sup> Least square (LS) mean and standard error (SE) per treatment group

<sup>c</sup> Treatment Effect: Least square (LS) mean difference and 97.5% confidence intervals (CIs) between BXCL501 and Placebo

<sup>d</sup> p value comparing BXCL501 and Placebo

**eFigure 1. Percentage of patients with a response<sup>a</sup> on the PEC total score**

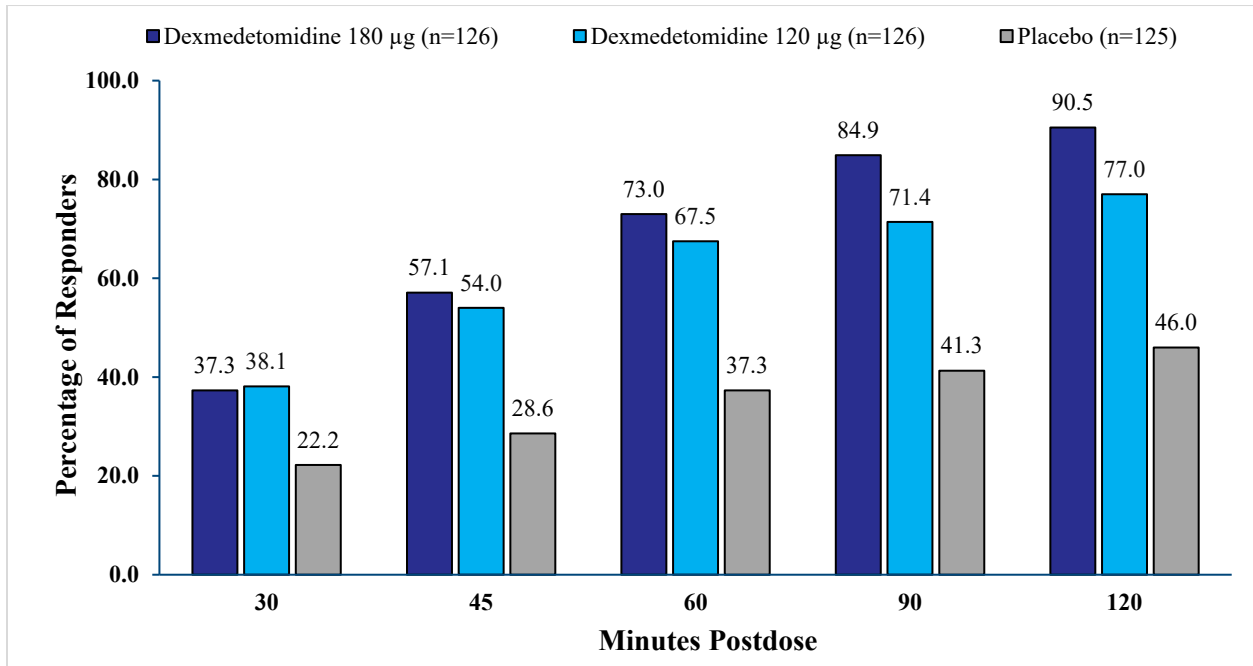

Abbreviations: PEC (Positive and Negative Syndrome Scale-Excited Component) comprised of 5 items with a total score range of 5 (absence of agitation) to 35 (extremely severe)

<sup>a</sup>Defined by  $\geq 40\%$  reduction from baseline on the PEC total score.

**eFigure 2. Mean (standard deviation) on the Clinical Global Impression-Improvement scale**

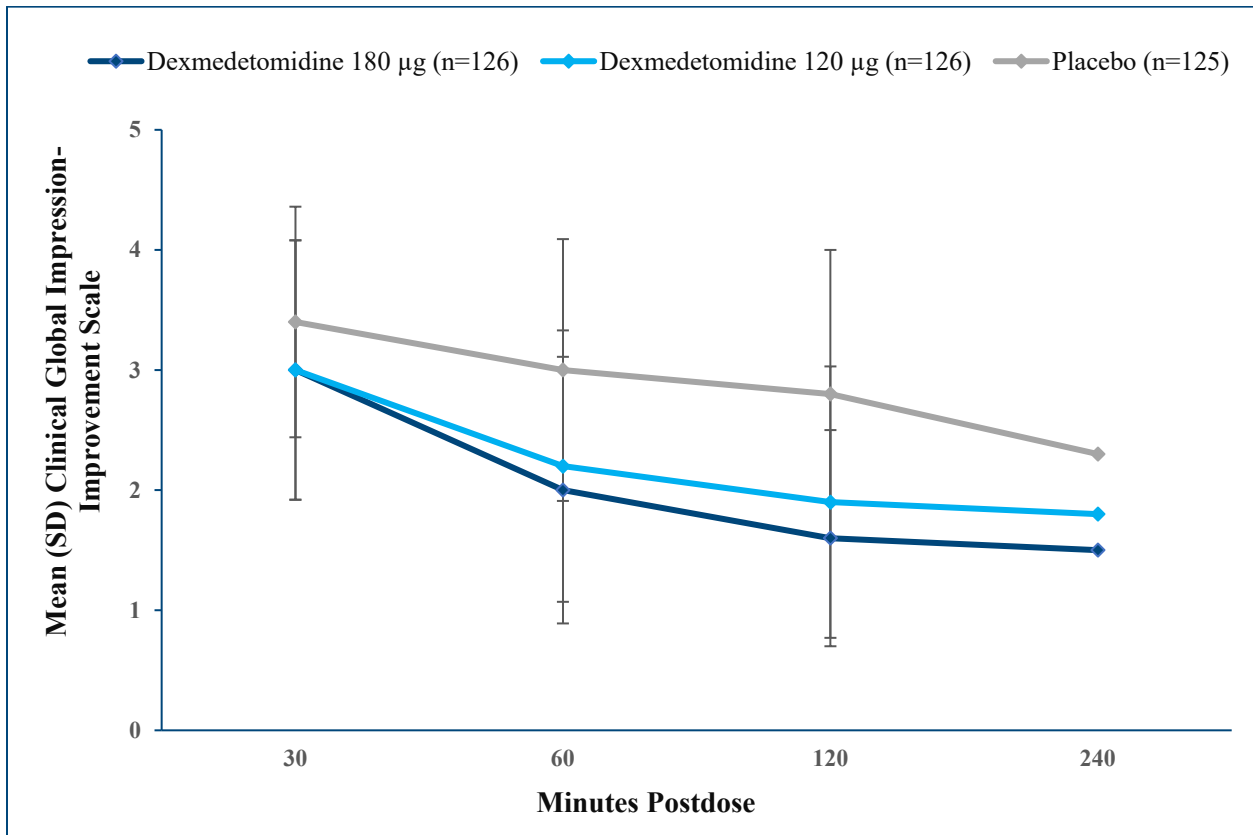

Abbreviations: SD (standard deviation)

Clinical Global Impression-Improvement evaluated drug response on agitation. Scores range from 1 to 7: 1=very much improved, 2=much improved, 3=minimally improved, 4=no change, 5=minimally worse, 6=much worse, 7=very much worse

**eFigure 3. Percentage of patients with a response<sup>a</sup> on the Clinical Global Impression-Improvement scale**

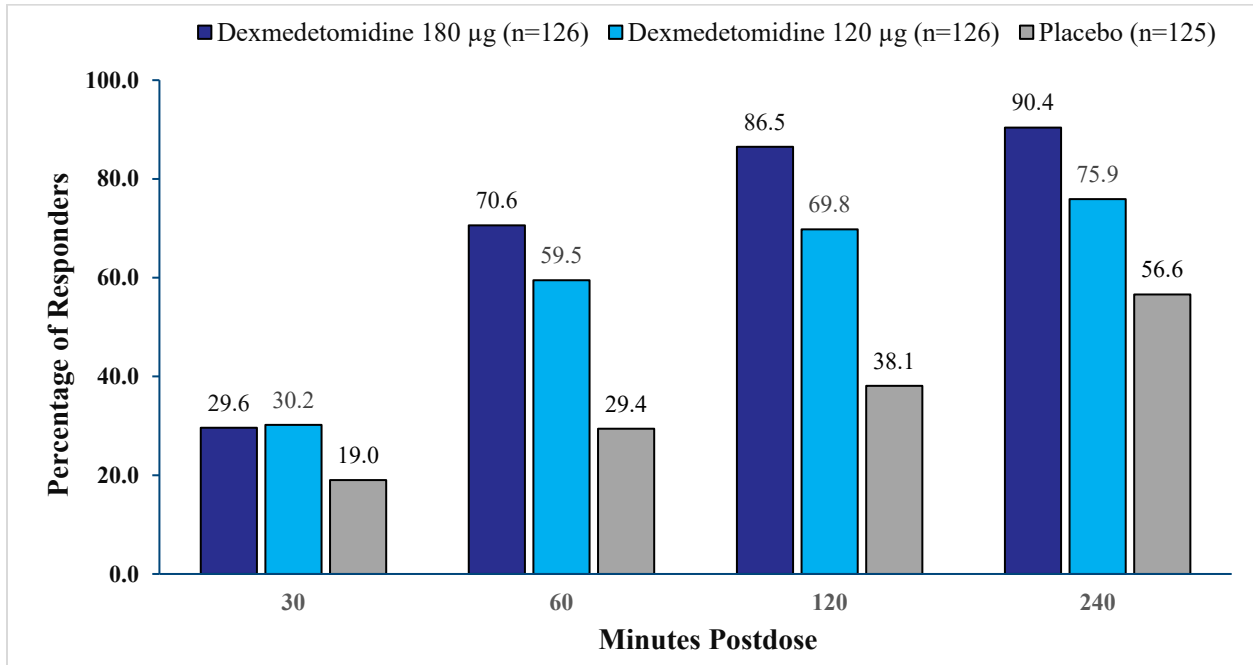

<sup>a</sup>Defined by a score of 1 (very much improved) or 2 (much improved)

<sup>b</sup>Clinical Global Impression-Improvement evaluated drug response on agitation. Scores range from 1 to 7: 1=very much improved, 2=much improved, 3=minimally improved, 4=no change, 5=minimally worse, 6=much worse, 7=very much worse

**eFigure 4. Percentage of patients with resolution<sup>a</sup> of agitation on the Agitation-Calmness Evaluation Scale**

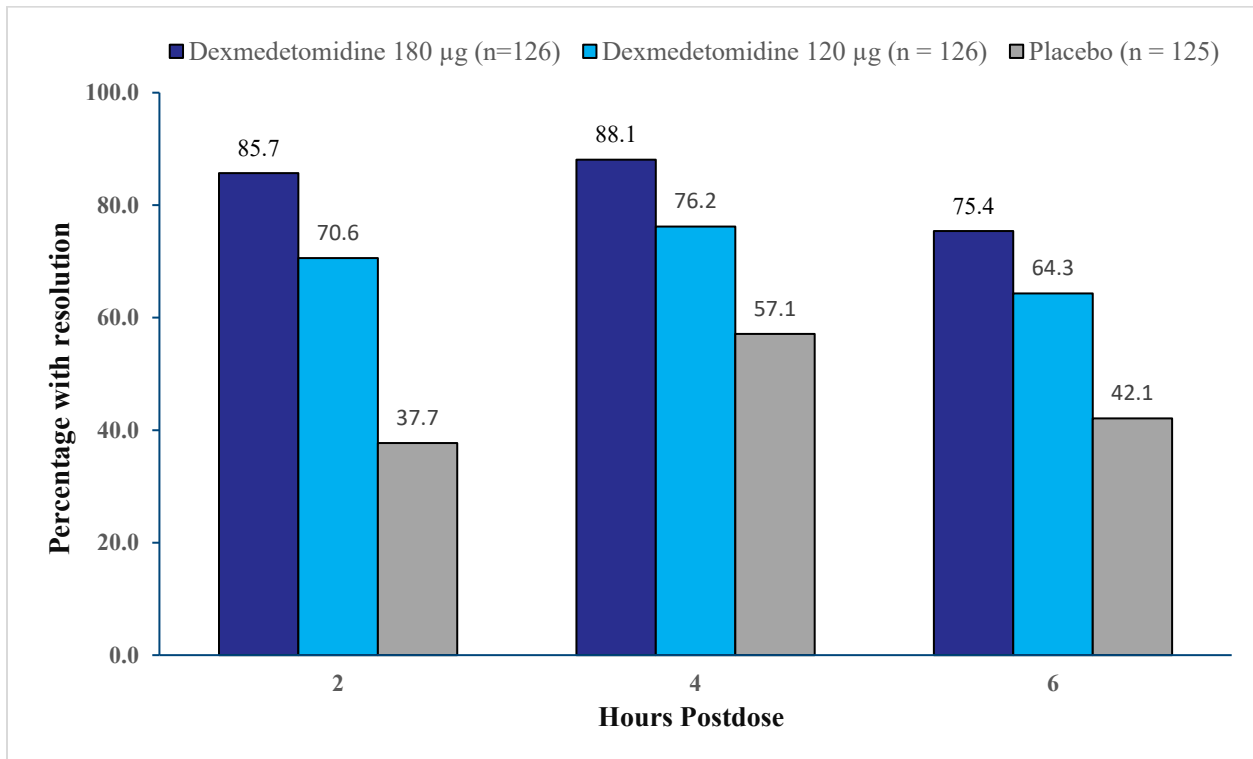

<sup>a</sup>Defined by a score of  $\geq 4$  on the Agitation-Calmness Evaluation Scale

The Agitation-Calmness Evaluation Scale (ACES) is a single item measure used to rate overall agitation and calmness where 1=marked agitation, 2=moderate agitation, 3=mild agitation, 4=normal behavior, 5=mild calmness, 6=moderate calmness, 7=marked calmness, 8=deep sleep, and 9=unarousable

**eFigure 5. Mean (standard deviation) change from baseline on the Agitation-Calmness Evaluation Scale**

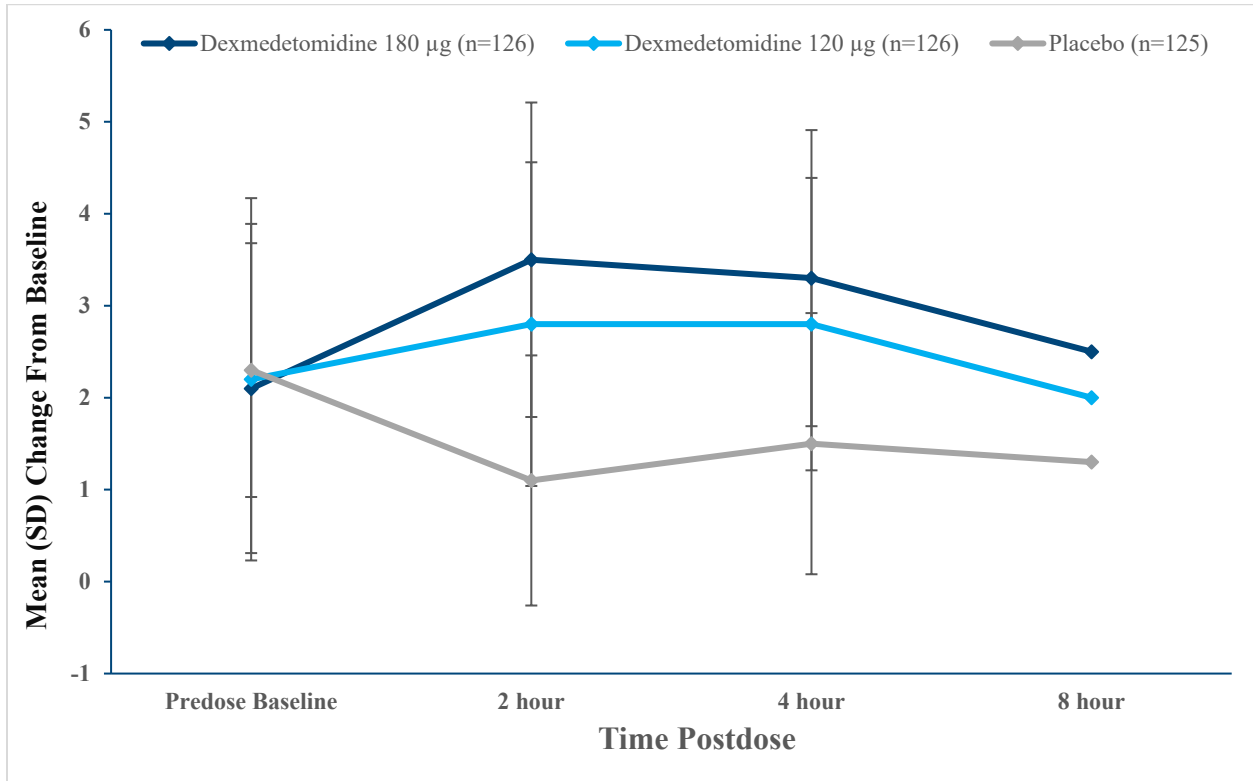

The Agitation-Calmness Evaluation Scale (ACES) is a single item measure used to rate overall agitation and calmness, where 1=marked agitation, 2=moderate agitation, 3=mild agitation, 4=normal behavior, 5=mild calmness, 6=moderate calmness, 7=marked calmness, 8=deep sleep, and 9=unarousable
