# Supplementary material
Source: PubMed Central journal article supplement (PMC8864508)
Supplement: jama-e220799-s004.pdf [file jama-e220799-s004.pdf]

## **Data Sharing Statement**

### **Data**

**Data available:** No

### **Additional Information**

**Explanation for why data not available:** Sheldon Preskorn MD will review data requests for the data upon this manuscript is based and may provide these data for review purposes. Data from this study are available from the study protocol, statistical analysis plan, manuscript, and data supplement.
